# Supplementary material for: miR-486 is essential for muscle function and suppresses a dystrophic transcriptome
Source: Life Sci Alliance. 2022 May 5;5(9):e202101215. doi: 10.26508/lsa.202101215 (PMC9087951; doi:10.26508/lsa.202101215)
Supplement: Supplementary file 1 [file LSA-2021-01215_TableS1.xlsx]

## Sheet: Table 1
Supplementary Table 1. Full list of target peaks identified via chimeric eCLIP-sequencing. Table consisting of the entire chimeric eCLIP-sequencing list of 18 direct targets of miR-486 in vivo with stringent filtering parameters.
Full list of peaks identified via chimeric eCLIP-seq
Chromosome	Log2 Fold Change	Strand	Gene Symbol	Gene Name	miR-486 binding location
chr16	10.8363	+	Eif4g1	Eukaryotic translation initiation factor 4G	3' splice site
chrX	10.5287	-	Lamp2	Lysosomal associated membrane protein 2	CDS
chr6	10.2451	+	Bhlhe40	Basic helix-loop-helix family member e40	3' UTR
chr13	10.0228	-	Auh	AU RNA binding methylglutaconyl-CoA Hydratase	3' UTR
chr8	9.93536	+	Mt2	Metallothionein 2	CDS
chr18	9.48109	+	Atp5a1	AtP synthase subunit alpha 1	CDS
chr17	8.86887	+	Myom1	Myomesin 1	CDS
chr10	8.79419	+	Naca	Nascent polypeptide-associated complex subunit alpha	CDS
chr18	8.5895	+	Bin1	Myc box-dependent interacting protein 1	CDS
chr18	8.58928	+	Camk2a	Calcium/calmodulin dependent protein kinase II alpha	3' UTR
chr5	8.52181	-	Phtf2	Putative homeodomain transcription factor 2	3' UTR
chr2	8.52158	-	Ttn	Titin	CDS
chr4	8.39395	+	Trim63	Tripartite motif containing 63	3' UTR
chr19	8.29972	+	Pygm	Glycogen phosphorylase muscle associated	CDS
chr11	6.62377	-	Pgam2	Phosphoglycerate mutase 2	CDS
chr11	5.6637	+	Myh4	Myosin heavy chain 4	CDS
chr19	5.56738	-	Actn3	Alpha-actinin-3	CDS
chr2	4.79121	-	Tnnc2	Troponin C2	CDS
