# Supplementary material for: miR-486 is essential for muscle function and suppresses a dystrophic transcriptome
Source: Life Sci Alliance. 2022 May 5;5(9):e202101215. doi: 10.26508/lsa.202101215 (PMC9087951; doi:10.26508/lsa.202101215)
Supplement: Supplementary file 2 [file LSA-2021-01215_TableS2.xlsx]

## Sheet: Table 1
Supplementary Table 2. Summary table of the total number of overlapping transcripts from the manuscript. Table of total overlapping transcripts identified by mir-486 KO versus WT tibialis anterior muscle RNA-seq, chimeric miR-486 eCLIP-seq, and mdx5cv versus WT tibialis anterior muscle RNA-seq datasets. Targets were identified following count normalization, principal component analysis was perfor…
miR-486 Targets Identified
	mir-486 KO	miR-486 chimeric eCLIP-seq
Total Number of targets identified	204	18
Targets up in miR-486 KO	16	0
Targets down in mdx5cv	16	14
Overlapping targets validated	30	18
