# Supplementary material for: miR-486 is essential for muscle function and suppresses a dystrophic transcriptome
Source: Life Sci Alliance. 2022 May 5;5(9):e202101215. doi: 10.26508/lsa.202101215 (PMC9087951; doi:10.26508/lsa.202101215)
Supplement: Supplementary file 3 [file LSA-2021-01215_TableS3.xlsx]

## Sheet: Overlapping targets Summary
Supplementary Table 3.		mir-486 KO vs. mdx5cv
		mdx5cv vs. chimeric eCLIP-seq
	RNA-seq		chimeric eCLIP-seq
	mir-486 KO	mdx5cv	Target
	Ppp1r3c	Ces1d	Atp5a1
	Actc1	Ppp1r1a	Actn3
	Klf15	Efcab6	Trim63
	Smox	Mettl21c	Eif4g1
	Col1a1	Mstn	Camk2a
	Ces2c	Fbp2	Pygm
	Idh2	Cd24a	Myom1
	Plxna2	0610040J01Rik	Phft2
	Nedd4l	Armh4	Ttn
	Tiparp	Col6a2	Naca
	Hacd1	Smyd2	pgam2
	Sparc	Eno1	Auh
	Col1a2	Col6a1	Mt2
	Med26	2310065F04Rik	Tnnc2
	Egr1	Rhou	Lamp2
	A330023F24Rik	Cblb	Bin1
	Col3a1	Angptl2	Myh4
	Gadl1	Dach2
	Foxo1	Cyp4f39
	Myl2	Scoc
	Perp	Zbtb38
	Mn1	Calm1
	Arsi	Zswim4
	Mpp3	Raver2
	Cyr61	Esrrg
	Gys2	Frzb
	Fxyd6	Bdh1
	Otog	Sms
	Id2	Slc15a5
	Clu	Fads6
	Nrip1	Gpcpd1
	Kctd12b	Homer1
	Dgat2	Mt2
	Cited2	Myo5a
	Arhgap6	Sparc
	Cuzd1	Zim1
	Mettl21c	Pld3
	H2-Q7	Amd1
	Ell2	Tmem132b
	Npy1r	mt-Ti
	Slc27a1	Gfer
	1190002N15Rik	Ostn
	Ahnak	Tuba8
	Ttll7	Mgst1
	Plk2	Homer2
	Myct1	Tmem100
	4930481A15Rik	Igsf10
	Acss1	Kctd12
	Aplnr	Hspa1l
	Tsc22d3	Pla2g7
	Rasl12	Nlrc5
	Hes1	Slc43a2
	Nmrk2	Ahnak
	Ush1c	Ttll7
	Comp	Mxra8
	Cilp2	Fbxl4
	Adhfe1	Kcnq5
	Stbd1	Tlcd4
	Nqo1	Adam19
	Dupd1	Aebp1
	Atp1a4	Gcsh
	Inha	mt-Tw
	Cda	Fbln7
	Cdkn1a	Arhgap20
	Arl4d	Cdh4
	Meg3	Tns3
	Npr3	Crim1
	Gpx3	Cmbl
	Inmt	E2f2
	0610040J01Rik	Ache
	Adamts20	Kcng4
	Maob	Plxnb2
	Syt3	Fabp3
	Slc25a22	Fat3
	Pde4d	Lmna
	S100a9	Lgalsl
	Mt3	Mettl11b
	Socs3	Abcd2
	Slc25a34	Gm25291
	Hpx	Dpysl3
	Pim3	Gadd45gip1
	Wnt4	Ephx2
	Nfil3	Tagln2
	Slc7a5	Abr
	Angpt1	Mfsd4a
	Fgf6	mt-Nd3
	Tbc1d4	Dkk3
	Cyp2c44	Map1a
	Dusp10	H4c9
	Tdrkh	Dusp26
	Fam198b	2310016D03Rik
	Oacyl	Ptgfrn
	Glul	Timp3
	Polm	Atp2a2
	Gm15816	Rap1gap2
	Slc2a3	Pdpn
	Tlr5	Ftl1
	Clec14a	Sbno2
	Kcnj2	Fam20b
	Rnft2	Gm29521
	Map1a	Fam129b
	Fbxl22	Alpk2
	Nudt11, Nudt10	Maged2
	Nr4a1	Qsox1
	Map3k7cl	Kpna1
	Cacnb3	Cacna2d4
	Ptger4	Hs3st5
	Slc1a1	Egr1
	Plekho1	Kcnma1
	Sh2d6	Eci1
	Peg3	Abca1
	Npnt	Slc4a4
	Tmem132b	Lsp1
	Aldh1a2	Aqp4
	Thbs4	Esrrb
	Serpinb1a	Pkdcc
	Serpina3k	Slc38a4
	Ncam1	Sh3bp2
	Tob2	Irgm2
	Smim3	Ctnna3
	Spsb2	Ppp1r3c
	Zfp36	mt-Tt
	Akap5	Timm23
	Tph1	Rasd2
	Lvrn	mt-Co3
	Has3	1700001O22Rik
	Ccl7	Tubb5
	Igf1	Prex1
	1500017E21Rik	Srcin1
	Trem2	Dock8
	Alox12	Tspo
	Col11a1	Exph5
	Ptgir	Mpp1
	Etv4	Kif3c
	Olfml3	Adgrf5
	Syt15	Efhd2
	Cercam	Tep1
	Hic1	Acadl
	Kcnf1	Smarca1
	Rab27b	Dusp8
	Lancl3	Paqr9
	Retnla	Odf3l2
	Ttc9	Ubl3
	Cyp1b1	Asb5
	Nlrc5	Pgam2
	Mirg	Auh
	Doc2b	Adamts2
	Socs1	Ptpre
	Arrdc3	Ubc
	Slc18a1	Ssc5d
	Edn1	Nfkb2
	Fmod	mt-Co2
	Lrrc3b	H2-K1
	Ikzf4	Taf9b
	Dusp5	Wnk3
	Mrgprf	Rragd
	Adig	Plekho1
	Nepn	Tnnc2
	Tmem8c	Lamp2
	Selp	Nhs
	Tgtp2	Gpx1
	Themis3	Lipa
	Gfra1	Wdfy1
	Hsf2bp	Acadm
	Apoa2	Spryd7
	S100a4	Col5a3
	Gm13446	Flt1
	Fos	As3mt
	Kit	Thbs3
	Uchl1	Firre
	Tlr1	Osbpl6
	Rrad	Acadvl
	Aldh1a7	Pgm2l1
	Dpyd	Myom1
	Tmem98	Hip1
	Plpp2	Sytl2
	Runx1	Il17ra
	Cx3cr1	Arpp21
	Lrp8	Phft2
	Angptl7	Gprc5b
	Gck	Cpt2
	Mfap4	Slc25a20
	Celsr3	Ifi207
	Tnc	Mrc2
	Slc16a13	Retsat
	Ccdc163	Ttn
	Ccl2	Arl6ip5
	Baiap2l2	H2-DMa
	Pla2g2d	Eif4g1
	Itih4	Camk2a
	Fat3	Gm15543
	Wif1	Bche
	Ces1d	Mcrip2
	Rasgrf1	Pygm
	Slc6a2	Tap1
	Cdh4	Ech1
	Slc16a8	Vsir
	Gprc5a	Mast3
	Igsf1	Atp5a1
	Dach2	Actn3
	Fam169b	Trim63
	F2	Fos
Table S3. Comparison of shared and dysregulated miR-486 and DMD transcripts from datasets in the manuscript. Comparison of mir-486 KO versus WT tibialis anterior muscle RNA-seq, chimeric miR-486 eCLIP-seq, and mdx5cv versus WT tibialis anterior muscle RNA-seq datasets. Table showing dysregulated (Benjamini-Hochberg false discover rate adjusted P-value < 0.05 and if the transcripts contained an ab…
